# Supplementary material for: Highly reversible sodium storage in a GeP5/C composite anode with large capacity and low voltage
Source: Royal Society of Chemistry journal article supplement (doi:10.1039/c7ta00139h), 2017-01-01
Supplement: c7ta00139h1.pdf [file c7ta00139h1.pdf]

## Supporting Information

### Highly reversible sodium storage in GeP<sub>5</sub>/C composite anode with large capacity and low voltage

Wenwu Li,<sup>a</sup> Linbo Ke,<sup>a</sup> Yaqing Wei,<sup>a</sup> Shaohua Guo,<sup>b</sup> Lin Gan,<sup>a</sup> Huiqiao Li,<sup>\*a</sup> Tianyou Zhai<sup>\*a</sup> and Haoshen Zhou<sup>b</sup>

<sup>a</sup> State Key Laboratory of Material Processing and Die & Mould Technology, School of Materials Science and Engineering, Huazhong University of Science and Technology (HUST), Wuhan 430074, Hubei, P. R. China.

\* E-mail: [hqli@hust.edu.cn](mailto:hqli@hust.edu.cn) (H. Q. Li); [zhaity@hust.edu.cn](mailto:zhaity@hust.edu.cn) (T. Y. Zhai)

<sup>b</sup> Energy Technology Research Institute, National Institute of Advanced Industrial Science and Technology (AIST), Umezono 1-1-1, Tsukuba, Japan.

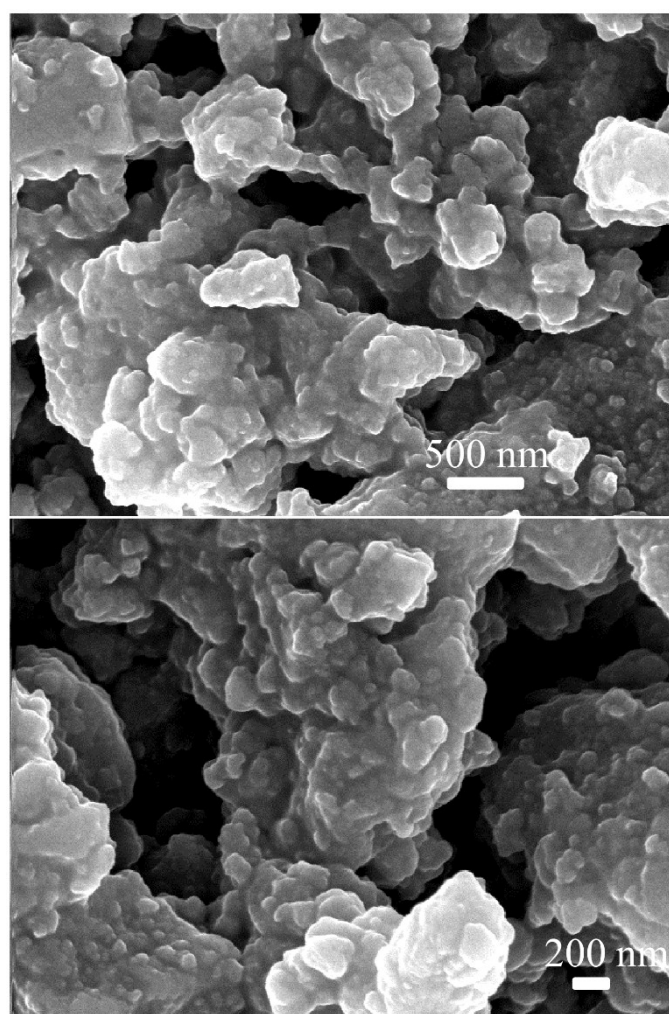

**Figure S1.** The high-magnification FSEM images taken on the agglomerated micro sized GeP<sub>5</sub> secondary grain.

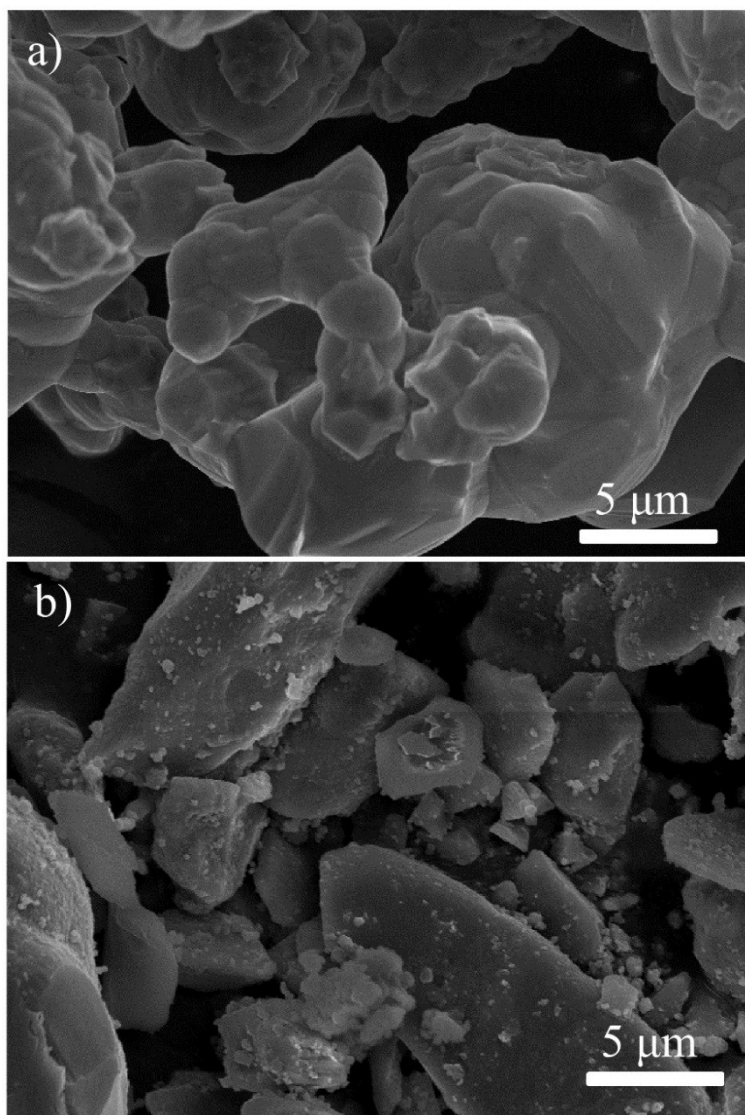

**Figure S2.** The FSEM images of (a) fresh Ge, and (b) P.

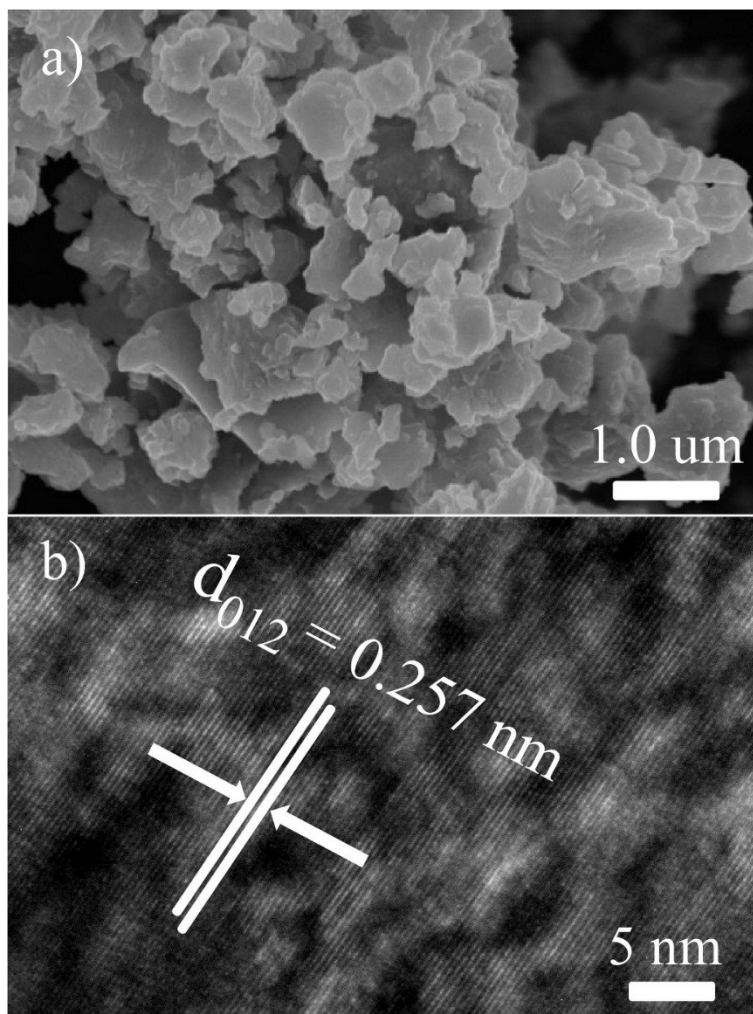

**Figure S3.** (a) The FSEM and HRTEM images of pure-phase  $\text{GeP}_5$ .

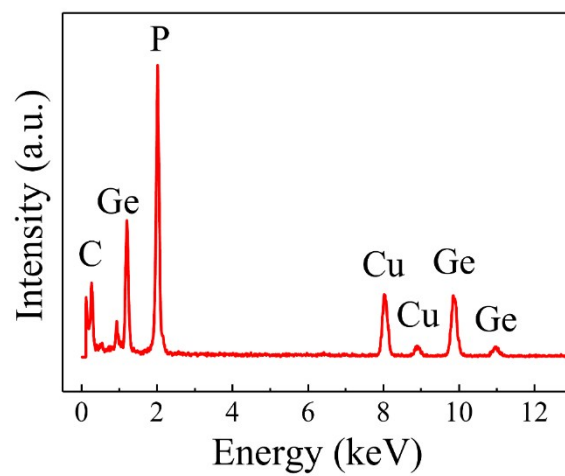

**Figure S4.** The EDX spectra of  $\text{GeP}_5/\text{C}$  composite.

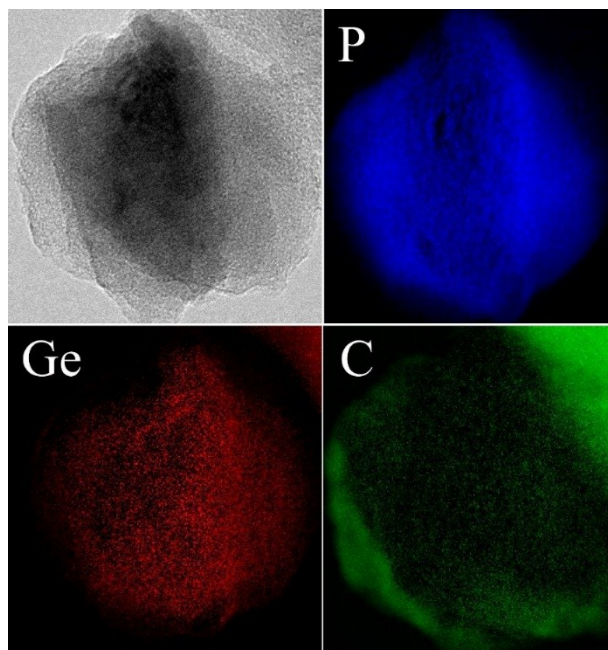

**Figure S5.** The individual elements distribution of of GeP<sub>5</sub>/C (elemental mapping).

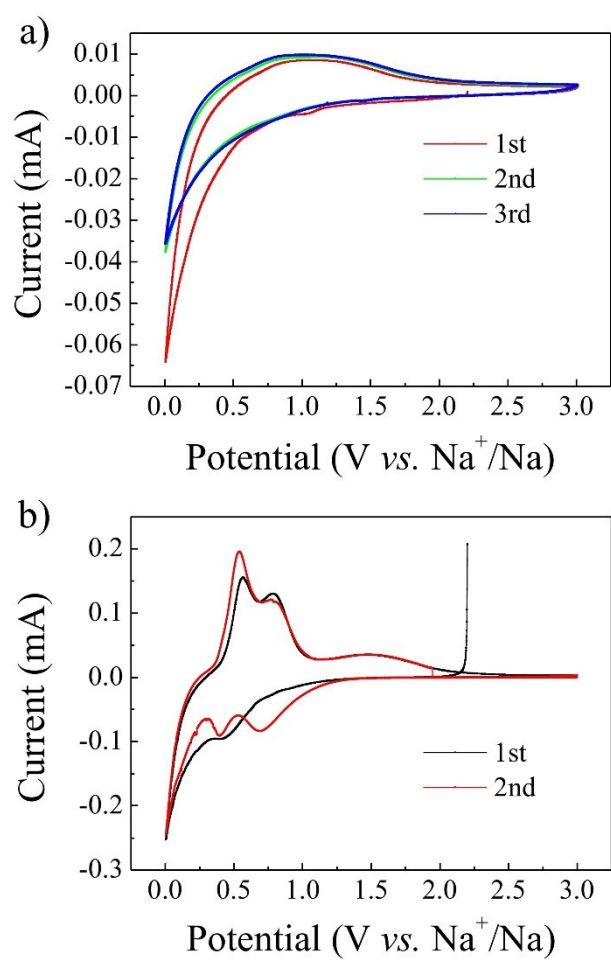

**Figure S6.** a) The initial three CV curves of Ge/C and b) P/C composite anode, respectively, at a scan rate of 0.05 mV s<sup>-1</sup>.

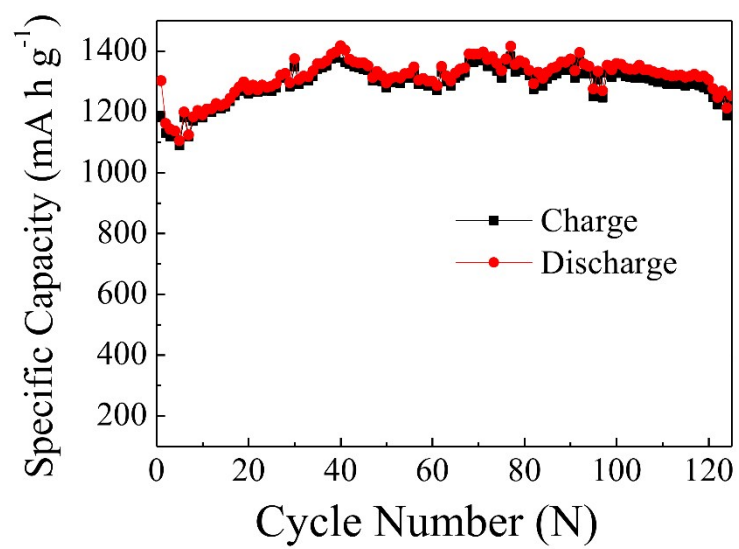

**Figure S7.** The cycle stability of GeP<sub>5</sub>/C composite at a current density of 50 mA g<sup>-1</sup>.

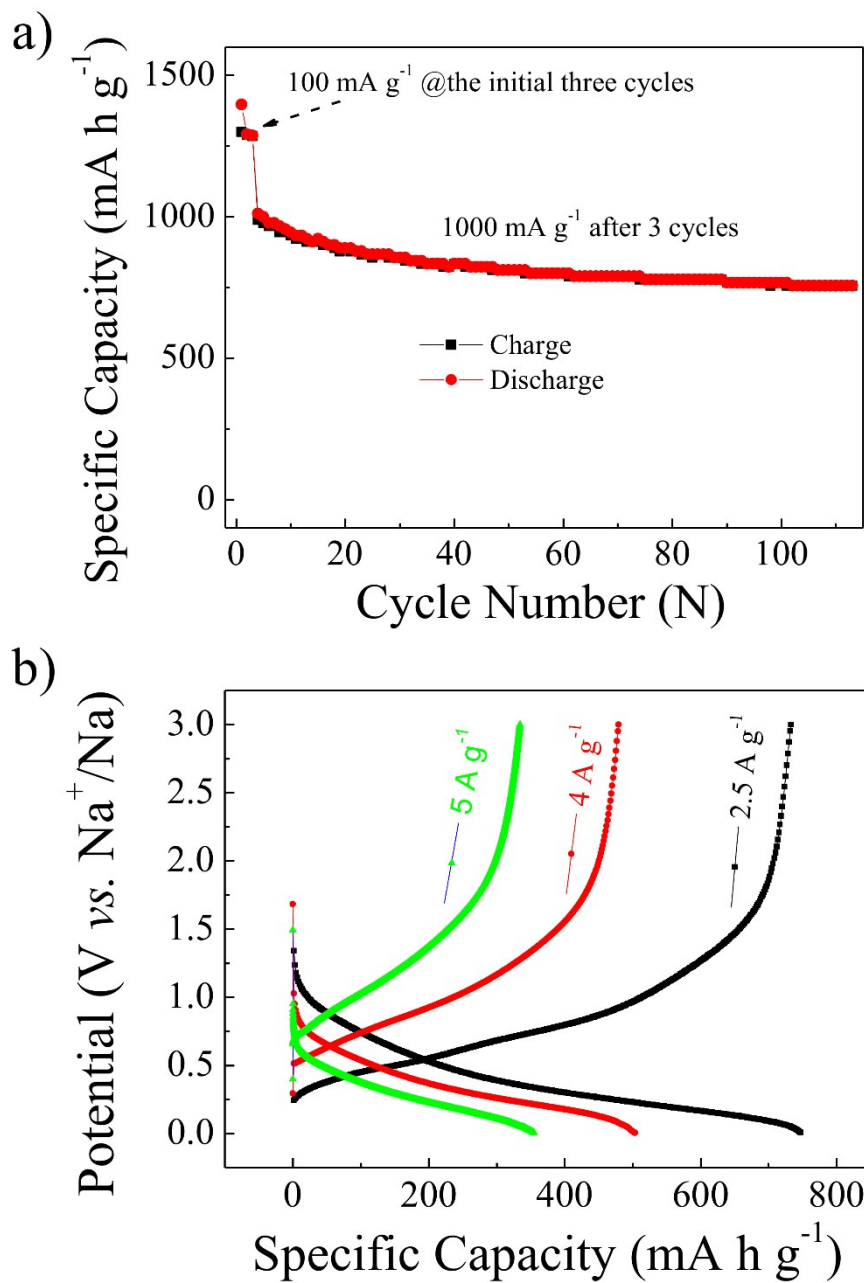

Figure S8. a) The cycle stability at the current density of  $1000 \text{ mA g}^{-1}$ ; b) The higher rate performances of  $\text{GeP}_5/\text{C}$  composite.

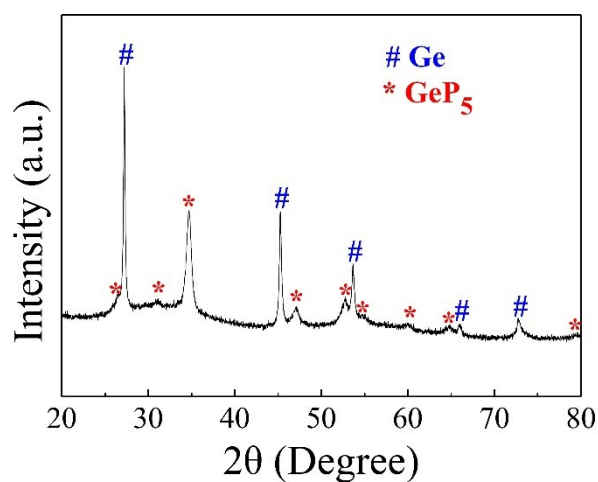

**Figure S9.** The XRD pattern of the mixture of  $\text{GeP}_5$ , P and Ge (marked as  $\text{GeP}_5\text{-P-Ge}$ ).

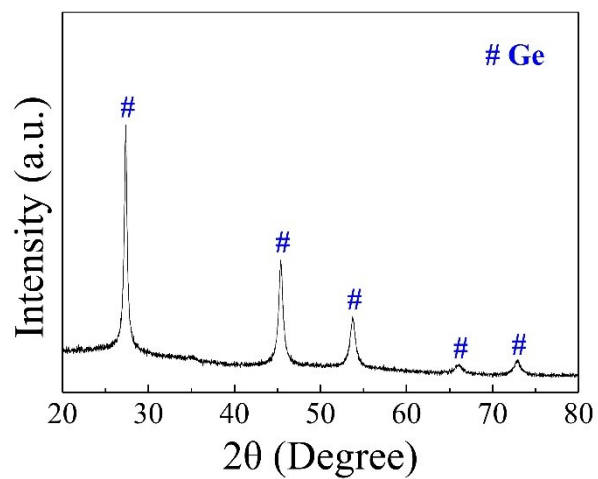

**Figure S10.** The XRD pattern of the mixture of Ge/C, and P/C (marked as Ge/C-P/C composite, and its atomic ratio of Ge:P is 1:5).

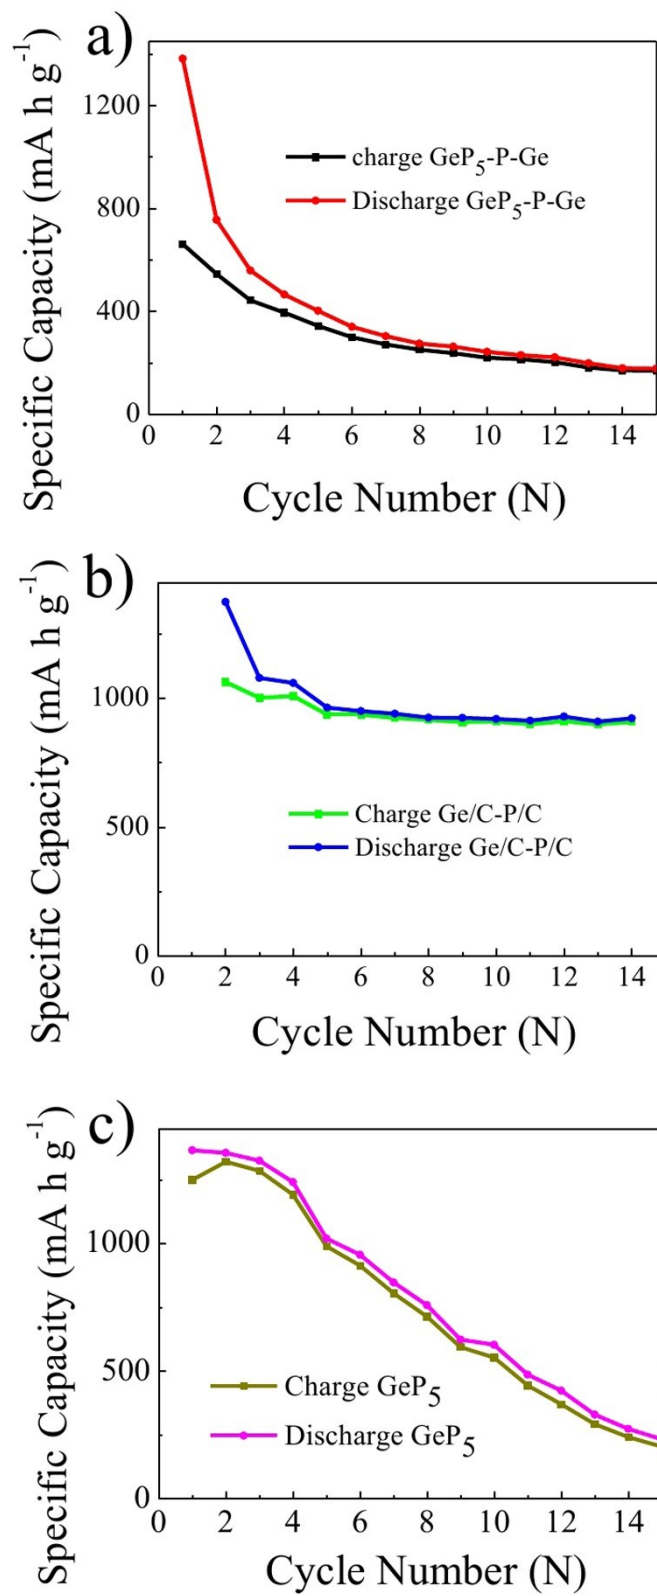

**Figure S11.** The electrochemical performances of a) the as-synthesized the medium  $\text{GeP}_5\text{-P-Ge}$  composite; b) the  $\text{Ge/C-P/C}$  composite; c) pure  $\text{GeP}_5$ .



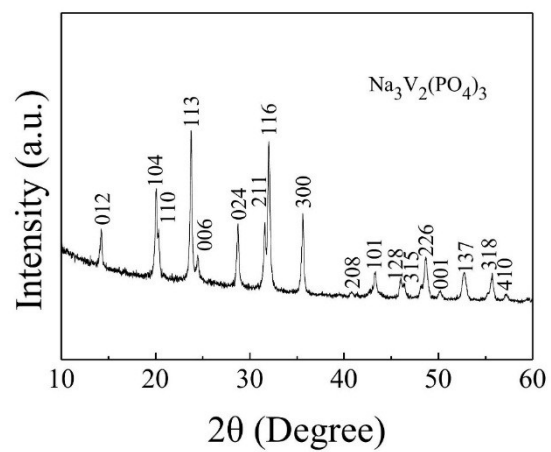

**Figure S12.** The XRD pattern of  $\text{Na}_3\text{V}_2(\text{PO}_4)_3/\text{C}$ .

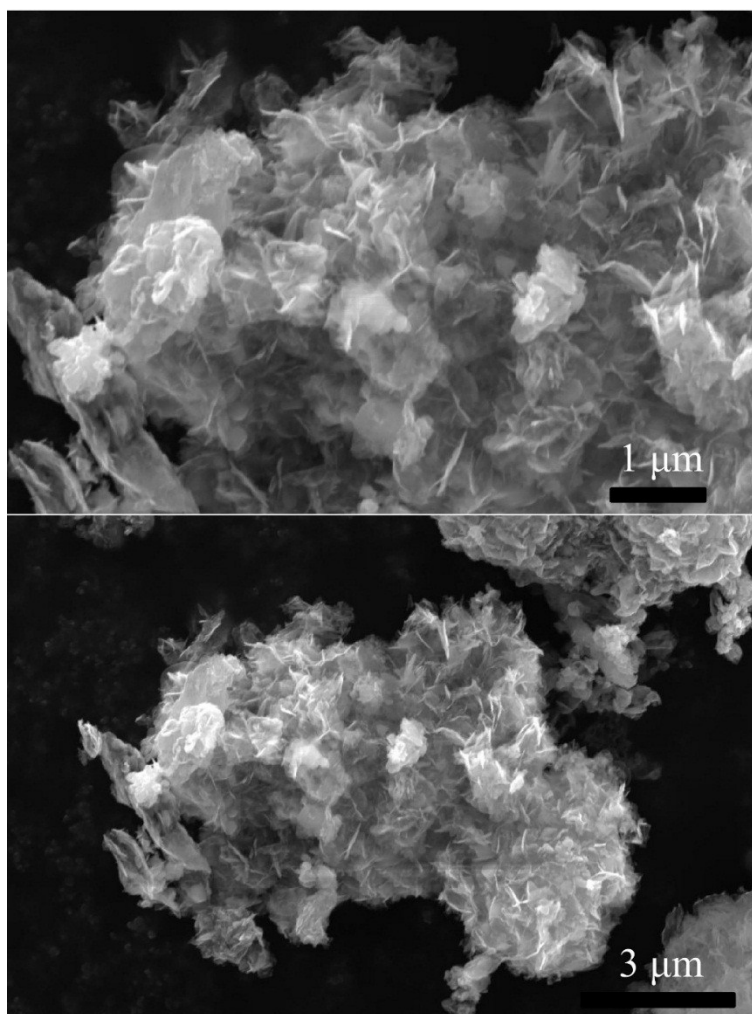

**Figure S13.** The FSEM images of  $\text{Na}_3\text{V}_2(\text{PO}_4)_3/\text{C}$ .

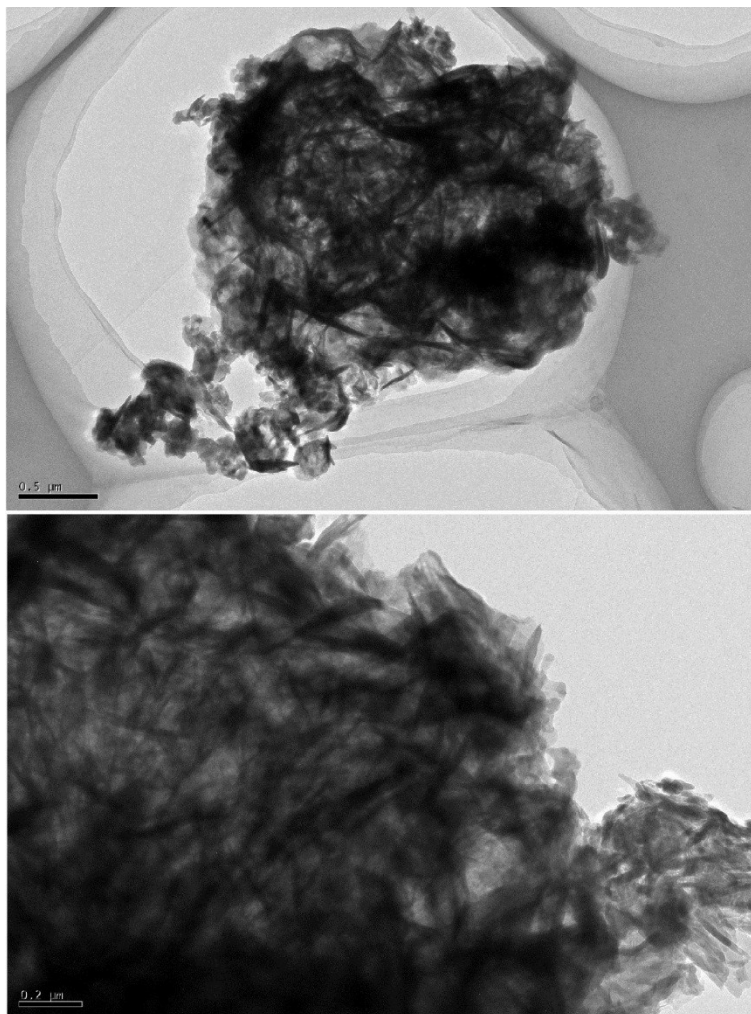

**Figure S14.** The TEM images of  $\text{Na}_3\text{V}_2(\text{PO}_4)_3/\text{C}$ .

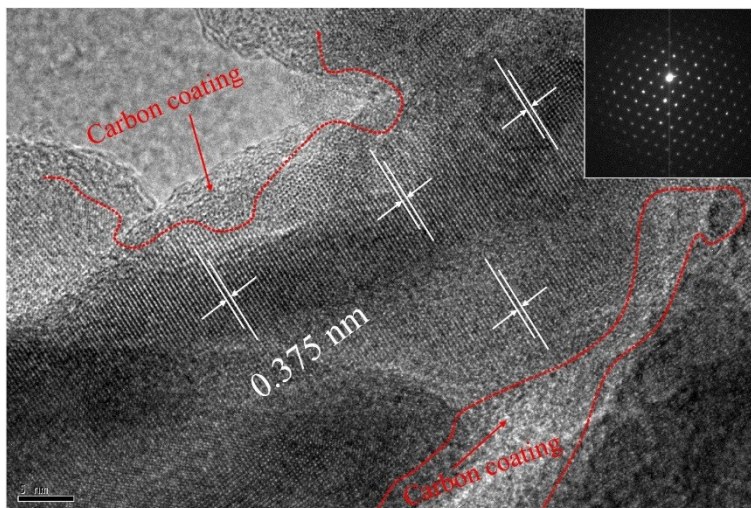

**Figure S15.** The TEM images of  $\text{Na}_3\text{V}_2(\text{PO}_4)_3/\text{C}$ .
